1 Article

# 2 Uniaxial loading induces a scalable switch in 3 cortical actomyosin flow polarization and reveals 4 mechanosensitive regulation of cytokinesis

5 Deepika Singh<sup>1#</sup>, Devang Odedra<sup>1#</sup> and Christian Pohl<sup>1,\*</sup>

6 1 Buchmann Institute for Molecular Life Sciences and Institute of Biochemistry II, Goethe University, Max-  
7 von-Laue-Strasse 15, 60438 Frankfurt (Main), Germany; deepikasingh1987@gmail.com;  
8 devd.odedra@gmail.com; pohl@em.uni-frankfurt.de

9

10 # Authors contributed equally.

11

12 \* Correspondence: pohl@em.uni-frankfurt.de; Tel.: 0049-69-798-42589

13

14 **Abstract:** During animal development, it is crucial that cells can sense and adapt to mechanical  
15 forces from their environment. Ultimately, these forces are transduced through the actomyosin  
16 cortex. How the cortex can simultaneously respond to and create forces during cytokinesis is not  
17 well understood. Here we show that under mechanical stress, cortical actomyosin flow switches its  
18 polarization during cytokinesis in the *C. elegans* embryo. In unstressed embryos, longitudinal cortical  
19 flows contribute to contractile ring formation, while rotational cortical flow is additionally induced in  
20 uniaxially loaded embryos. Rotational cortical flow is required for the redistribution of the actomyosin  
21 cortex in loaded embryos. Rupture of longitudinally aligned cortical fibers during cortex rotation  
22 releases tension, initiates orthogonal longitudinal flow and thereby contributes to furrowing in loaded  
23 embryos. A targeted screen for factors required for rotational flow revealed that actomyosin  
24 regulators involved in RhoA regulation, cortical polarity and chirality are all required for rotational  
25 flow and become essential for cytokinesis under mechanical stress. In sum, our findings extend the  
26 current framework of mechanical stress response during cell division and show scaling of orthogonal  
27 cortical flows to the amount of mechanical stress.

28 **Keywords:** actomyosin, cortical flow, embryo, cytokinesis, mechanosensitivity, *C. elegans*

29

---

## 30 1. Introduction

31 While cells remodel their actomyosin cortex during cell division, they have to simultaneously  
32 integrate chemical and mechanical stimuli from the local environment to ensure successful  
33 cytokinesis. In order for cytokinesis to be robust yet responsive to extrinsic stimuli, three fundamental

34 control principles have evolved, (a) redundancy [1], (b) mechanosensitivity [2], and (c)  
35 positive/negative feedback [3]. Examples for these control principles are (a) partially redundant  
36 molecular motors, actin cross-linkers, and membrane trafficking pathways, (b) molecular  
37 mechanosensitivity of integral cytokinesis proteins such as non-muscle myosin II,  $\alpha$ -actinin, and  
38 filamin [4, 5], and (c) RhoA-dependent self-enhancing local assembly and contraction of actomyosin  
39 as well as astral microtubule-based suppression of actomyosin contractility [6], which both are  
40 required to generate cortical contractile actomyosin flow during cell division.

41 Work in the last decade has led to the identification of the main mechanosensory system that  
42 operates during cell division. The core of this system is non-muscle myosin II, which can amplify  
43 sensed forces through its lever arm [4], and which shows mechanosensitive accumulation through  
44 cooperative binding to F-actin [7]. This results in a positive feedback on the assembly of non-muscle  
45 myosin II bipolar thick filaments [2]. In addition, for other mechanosensitive proteins, two conserved  
46 and distinct modes of force-dependent accumulation have been recently demonstrated, a rapid,  
47 diffusion-based mode due to tensile forces increasing the lifetime of the F-actin bound state (catch  
48 bonding), and a slower mode due to non-muscle myosin-II-dependent cortical flow [5]. The latter  
49 serves as an additional biomechanical positive feedback, strongly suggesting that cytokinesis control  
50 principles operate interdependently.

51 Among the control principles mentioned above, feedback during cytokinesis crucially depends  
52 on spindle microtubules since they constitute key modulators of cortical contractility [3]. Wolpert's and  
53 Rappaport's classical experiments have led to the astral relaxation model in which astral microtubules  
54 soften the polar cortex (by suppressing actomyosin contractility) while the equatorial cortex stiffens  
55 during division. Very recently, it was shown that polar clearing of contractile ring components requires  
56 TPXL-1-dependent cortical activation of Aurora A [6].

57 Moreover, the ability of the actomyosin cortex to contract and to generate long-range flow not  
58 only depends on the non-muscle myosin II motor protein but also on the spatial organization of actin  
59 filaments (polarization, branching, bundling) and their connectivity (degree and density of crosslinks)  
60 [8]. Recently, it has been shown that non-muscle myosin II-powered cortical actomyosin flow leads  
61 to contractile ring formation by alignment of actin filaments in the *C. elegans* one cell embryo due to  
62 compression of the gel-like cortex in the equatorial region [9]. This suggests that non-muscle myosin  
63 II-dependent flow indeed re-organizes the cortical actin network during cytokinesis as has been  
64 proposed previously [10]. It also suggests that self-enhancing feedback mechanisms are generally  
65 involved in self-organization of the cytokinetic cortex and involved particularly in forming the  
66 contractile ring. However, furrow formation due to coupling of cortical flow and actin alignment  
67 apparently only enhances but is not required for cytokinetic ring formation [9]. Moreover, actomyosin  
68 dynamics and architecture as well as cortical contractile actomyosin flows seem to variably contribute  
69 to cytokinesis progression when comparing different systems [3, 9, 11-17].

70 Furthermore, cortical contractile actomyosin flows in the *C. elegans* embryo are strictly  
71 dependent on RhoA activation and do not only cause translation of the cortex (like during  
72 anteroposterior polarization) [18] but also its rotation immediately before division of the two-cell  
73 embryo [19, 20] and during chiral symmetry breaking [21, 22]. Importantly, whole cell cortex rotation  
74 occurs during cell division when cytokinetic actomyosin nodes have formed. This mesoscopic  
75 rotational flow is most likely due to generation of torque at the molecular level: showed using in vitro  
76 assays that during myosin-driven sliding of actin filaments, a torque component can be observed [23]  
77 that induces a right-handed rotation of an actin filament around its long axis with one revolution per  
78 sliding distance of approximately 1  $\mu\text{m}$  [24]. Similar rotation or twirling of actin filaments have been  
79 confirmed in more recent reports [25, 26]. Although the molecular origin of torque in actomyosin  
80 dynamics is well understood, how torque leads to coordinated cortical rotational dynamics remains  
81 unexplored.

82 The division of the one-cell *C. elegans* embryo represents a highly suitable model to  
83 quantitatively dissect spatiotemporal dynamics of the cytokinetic actomyosin cortex and to uncover  
84 underlying regulatory principles [9, 18, 27-33]. Previously, it has been shown through highly  
85 informative ablation experiments of the contractile ring that it is able to repair requiring an increased  
86 tension in the ring and reduced cortical tension in the vicinity [34]. This strongly suggests that global  
87 cortical dynamics respond to mechanical stress during cytokinesis that might require differential  
88 regulation of cytokinetic cortical flow. Here, we quantitatively describe the biomechanical responses  
89 to a different type of stress, loading. For this, progressive uniaxial compression is used in the form of  
90 the classical parallel plate assay [35-37]. With this mechanical manipulation, it is possible to  
91 demonstrate that a recently uncovered type of polarizing cortical flow, rotational flow [19-21], is  
92 mechanoresponsive, scales to the amount of load and contributes to successful division when cells  
93 experience mechanical stress. Anisotropic mechanosensitive accumulation of non-muscle myosin II  
94 suggests that cortical stress is similarly anisotropic in uniaxially loaded embryos as has been recently  
95 shown for uniaxially loaded mammalian cells [38]. Importantly, rotational flow leads to a re-  
96 arrangement of the anisotropically distributed of actomyosin in loaded embryos. Cortical rotation  
97 requires a broad set of actomyosin regulators of which several only become essential for cytokinesis  
98 under mechanical stress. Hence, our data suggests that the main biological role of cortical flow re-  
99 polarization during cytokinesis lies in balancing spatial and tension anisotropies in the cortex and that  
100 converging longitudinal flow is required for successful furrowing in mechanically stressed embryos.  
101

## 102 **2. Materials and Methods**

### 103 *2.1 Worm Strains, maintenance and RNA interference*

104 Integrated *C. elegans* strains expressing lifeact-fusion proteins expressed from pie-1 promoters  
105 have been described elsewhere [39, 40]. Strains JJ1473 (zuls45), LP162 (*nmy-2(cp13)*), and  
106 RW10223 (itls37; stls10226) were provided by the Caenorhabditis Genetics Center (CGC), which is  
107 funded by NIH Office of Research Infrastructure Programs (P40 OD010440). Strains were maintained  
108 under standard conditions [41]. RNAi was performed by feeding using clones from commercially  
109 available libraries [42, 43].  
110

### 111 *2.2 Microscopy and laser ablation*

112 Embryo preparation and mounting has been described elsewhere [39, 44]. Mounting was  
113 modified by using differently sized polystyrene (15 $\mu$ m, 20 $\mu$ m, 25 $\mu$ m; Polysciences, Hirschberg,  
114 Germany) and polymethylmethacrylate spheres (12 $\mu$ m and 13.5 $\mu$ m, PolyAn, Berlin, Germany).  
115 Microscopy was performed with a VisiScope spinning disk confocal microscope system (Visitron  
116 Systems, Puchheim, Germany) based on a Leica DMI6000B inverted microscope, a Yokogawa CSU  
117 X1 scan head, and a Hamamatsu ImagEM EM-CCD. All acquisitions were performed at 21°C–23°C  
118 using a Leica HC PL APO 63 $\times$ /1.4-0.6 oil objective. Cell cortex ablations were performed using a  
119 pulsed 355 nm UV laser mounted on the same microscope. One ablation cycle was performed per  
120 acquisition with a residence time per pixel of 3.5 ms. Acquisitions pre-and post-ablation were  
121 performed with 200 ms intervals.  
122

### 123 *2.3 Particle image velocimetry (PIV)*

124 PIV analysis was performed on maximum intensity projected images using a custom version of  
125 PIVlab developed for MATLAB [44, 45]. This customized software is available from the authors upon  
126 request. Specifically, two pass interrogation windows of 64x64 pixels and 32x32 pixels with 50%

127 overlap were used to map consecutive frames acquired at 2 s intervals. To align the biological time  
128 of flow across embryos, we choose foci formation as starting point. To calculate vector maps,  
129 correlation between subsequent windows was computed using fast Fourier transformation (FFT).

130

#### 131 2.4 Quantification and kymograph representation of flow profiles

132 The flow profile for each time point was projected on the long axis of the embryo by dividing the  
133 whole vector profile of the embryo into 13 bins and taking a mean along the short axis. A time course  
134 profile or kymograph was obtained by averaging bin velocities for 5 embryos in each condition. For  
135 visualization, heat maps were generated after applying cubic interpolation using a custom MATLAB  
136 script. Variability between embryos for each condition was estimated by calculating standard error of  
137 mean.

138

#### 139 2.5 Measurements

140 NMY-2 and TBB-2 signal intensities, NMY-2 node number and size, NMY-2 filament contraction  
141 rate of linearly organized NMY-2, cortical residence times of NMY-2 and lifeact, NMY-2 outward flow  
142 velocities, spindle microtubule angles, as well as furrow asymmetry and anterior-posterior domain  
143 sizes were manually measured in ImageJ using the built-in toolset. Cortical residence times were  
144 measured from traces in kymographs or by tracking cortical structures in sequential frames of high-  
145 resolution time lapse series. Longitudinal flow range was measured in the anterior domain by  
146 extracting continuous tracks from PIV data that show velocities higher than 0.5  $\mu\text{m}/\text{min}$  and  
147 normalizing them to embryo length. Cleavage success was manually quantified by inspecting time-  
148 lapse microscopy data.

149 For shape parameter quantification of embryos in utero (Figure 3A), the embryo perimeter was  
150 segmented using a custom MATLAB script by applying a median filter and thresholding. Circularity  
151 was defined as  $4\pi(\text{area}/\text{perimeter}^2)$ .

152 Calculation of curvature to quantify blebbing (Figure 3G) was performed by segmentation of cell  
153 boundaries using a custom MATLAB script. For each time point, the boundary at the anterior end of  
154 the embryo was divided into 400 equidistant points. A circle was fit for each boundary point using this  
155 point and two boundary points that were four points away. The local curvature was defined as  
156 reciprocal of the radius of this fitted circle.

157 To establish that the *C. elegans* embryo follows Laplace's law (Figure 2A), sideview projections  
158 of embryos were obtained by using a custom MATLAB script. Projected images were denoised  
159 (Wiener filter) and the embryo's boundary was segmented by adaptive thresholding. For each point  
160 on the boundary, a circle was fitted on three points with a spacing of 30 points. Curvature was defined  
161 as the inverse of the radius of the fitted circle. Contact angles were measured based on segmented  
162 boundaries.

163

### 164 3. Results

#### 165 3.1 Convergent longitudinal flow polarizes cortical NMY-2

166 In order to establish an unbiased readout for cortical dynamics during cytokinesis, we performed  
167 time-lapse microscopy with high spatiotemporal resolution of the first division in wild type (wt) *C.*  
168 *elegans* embryos expressing NMY-2::GFP (a CRISPR/Cas9 edited GFP-fusion of an essential non-  
169 muscle myosin II gene) [46]. This data (Figure 1A) was then subjected to quantitative analysis by  
170 particle image velocimetry (PIV). PIV tracking revealed longitudinal cortical NMY-2 flows with opposite  
171 direction, from anterior ( $6\pm 0.05 \mu\text{m}/\text{min}$ ,  $n = 5$ ) and posterior poles ( $6.5\pm 0.09 \mu\text{m}/\text{min}$ ,  $n = 5$ ) towards  
172 the cell equator (Figure 1B, top panel; Video 1). Convergence of these flows at the equator leads to

173 the transformation of cortical NMY-2 nodes ( $1.8 \pm 0.1 \mu\text{m}$  in diameter,  $n = 25$ ) into parallel, linearly  
174 organized NMY-2 ( $0.25\text{-}0.5 \mu\text{m}$  in width and  $3.5 \pm 0.6 \mu\text{m}$  in length,  $n = 20$ ; Figure 1A,C), which first  
175 form a narrow stripe ( $6.8 \pm 0.07 \mu\text{m}$ ;  $n = 5$ ) that subsequently becomes part of the incipient contractile  
176 ring by alignment and bundling (Figure 1D; Video 1).

177 Previously, a physical model based on hydrodynamic active gel theory has explained formation  
178 of the F-actin component of the contractile ring by cortical flow [9, 47]. In this model, opposing flows  
179 that emerge at the poles and converge at the equator promote ordering of cortical actin filaments into  
180 parallel bundles (Figure 1E). In agreement with the model, our analyses revealed similar flow velocity  
181 profiles for NMY-2 and similar ordering during cortical flow (Figure 1F). Therefore, cortical flow not  
182 only polarizes F-actin but also NMY-2, thereby promoting contractile ring formation from linearly  
183 organized NMY-2 that undergoes bundling in the equatorial region (Figure 1E) [9]. Hence,  
184 hydrodynamic active gel theory combined with PIV-based NMY-2 cortical flow analysis seem well  
185 suited to investigate cytokinesis mechanics.

186 While analysis of NMY-2 foci dynamics during longitudinal flow revealed an average lifetime of  
187  $29 \pm 2 \text{ s}$  ( $n = 25$ ), analysis of F-actin (using lifeact::mCherry; [40]) shows that it does not concentrate  
188 in cortical NMY-2 foci and forms much smaller, uniformly sized ( $0.4 \pm 0.1 \mu\text{m}$ ;  $n = 20$ ) and long-lived  
189 ( $124 \pm 48 \text{ s}$ ;  $n = 20$ ) foci that do not undergo changes during cytokinesis (Figure 1G). Nevertheless,  
190 NMY-2 decorates actin filaments shortly after onset of cytokinesis; while actin filaments disassemble  
191 subsequently after around 15 s, linearly organized NMY-2 and NMY-2 foci have substantially longer  
192 half-lives (Figure 1H). Consistent with F-actin showing faster cortical turnover, we also find that F-  
193 actin shows slightly weaker longitudinal flow with a shorter range ( $0.3 \pm 0.2$  embryo lengths) when  
194 compared to NMY-2 ( $0.6 \pm 0.1$  embryo lengths; Figure 1I). This difference is most likely due to long-  
195 ranged flow requiring a certain degree of stable, filamentous network components. These kinetic  
196 differences also seem to contribute to NMY-2 accumulating at the furrow while F-actin does not  
197 accumulate at that site (Figure 1I). This is most striking during late cytokinesis where substantial  
198 amounts of linearly organized NMY-2 still flow towards the future midbody while F-actin does not  
199 show any recognizable flow at that stage (Figure 1F). These observations suggest - similar to what  
200 has been recently found in mammalian tissue culture [48] - that non-muscle myosin II might also be  
201 organized in aligned stacks in the *C. elegans* cortex that can span several micrometers and whose  
202 turnover is independent of the turnover of actin filaments.

203



## Figure 1

6 of 20

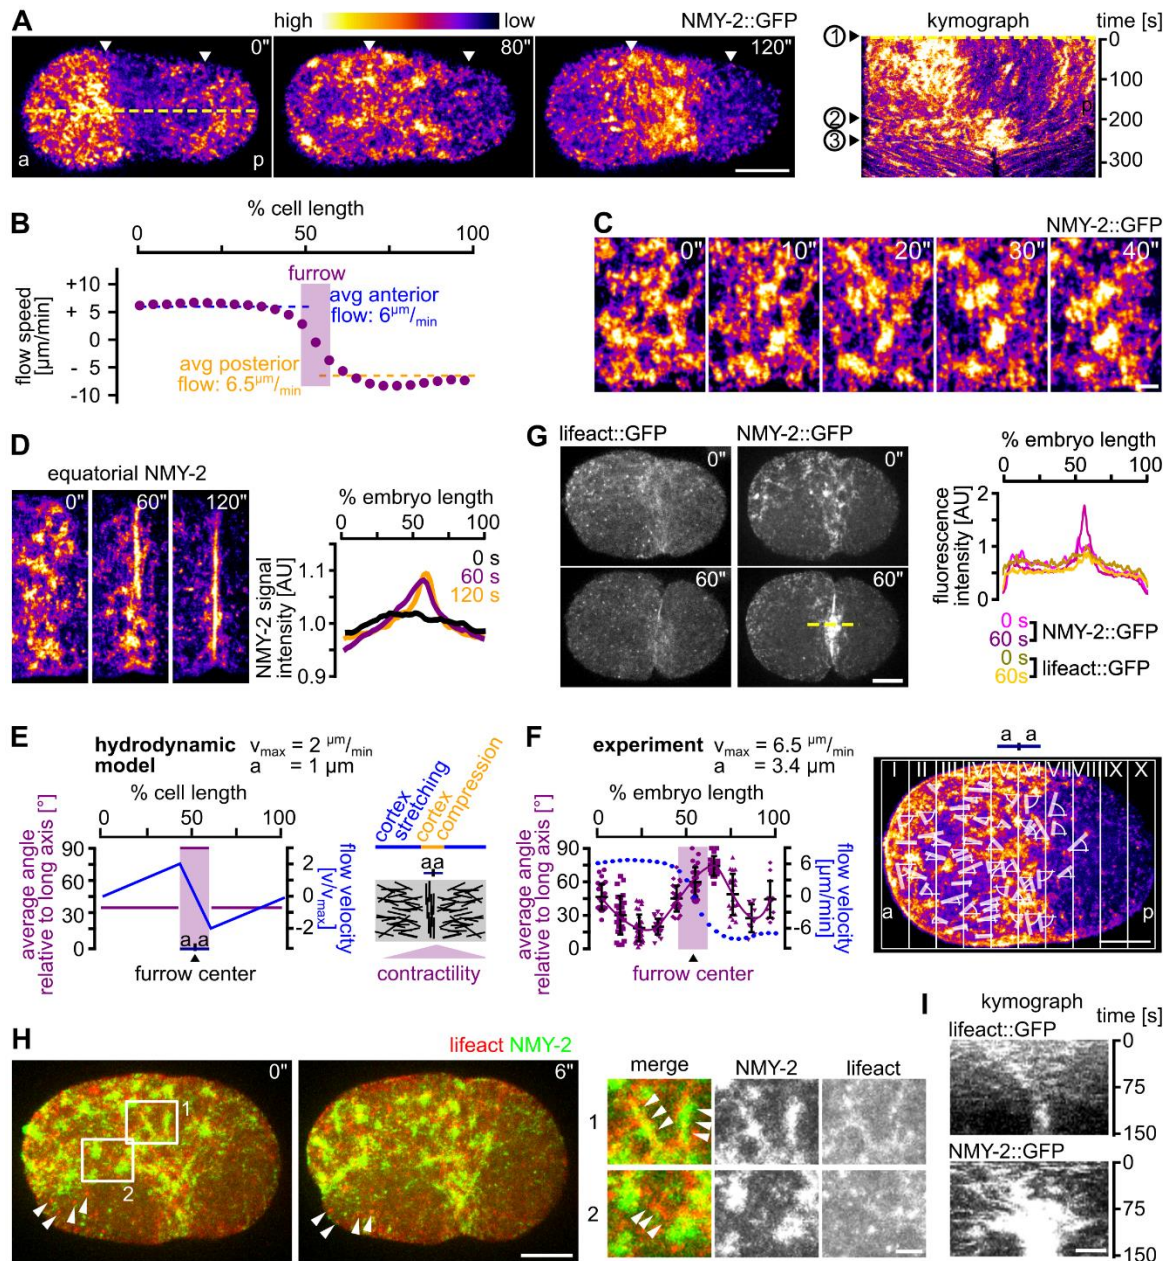

204

205 **Figure 1.** Longitudinal flow is organizes cortical NMY-2 during contractile ring formation. **(A)** Left:  
 206 Maximum projected stills from time lapse microscopy of embryos expressing NMY-2::GFP. White  
 207 arrow heads mark the boundaries of the anterior and posterior NMY-2 caps upon polarization. Right:  
 208 Kymograph along the yellow dashed line in the leftmost panel. Numbers on the left refer to onset of  
 209 cap formation (1), onset of NMY-2 cytokinetic foci formation (2), and start of furrow invagination (3).  
 210 Scale bar = 10  $\mu\text{m}$ . See also Video 1. **(B)** Average cortical NMY-2 flow velocity profile along the a-p  
 211 axis generated from PIV data of 5 embryos over the time window of longitudinal flow (60 s). **(C)**  
 212 Maximum projected stills from time lapse microscopy of the furrow region; scale bar = 2.5  $\mu\text{m}$ . **(D)**  
 213 Left: Stills from maximum projected embryos showing NMY-2 dynamics at the equatorial ring. Scale  
 214 bar = 2.5  $\mu\text{m}$ . Right: Normalized NMY-2::GFP signal intensities along the a-p axis in one-cell embryos.  
 215 Intensity profiles at 0 s, 60 s and 120 s are represented by black, purple and yellow traces, respectively  
 216 ( $n = 5$  each). **(E)** Quantification of NMY-2 linear orientation. Left: Distribution of order parameter and  
 217 flow velocity for a cylindrical system undergoing cytokinesis (see cartoon according to [47]). **(F)** Left:  
 218 Measured angle and flow velocities along the a-p axis ( $n = 5$ ). Right: Representative embryo with  
 219 angles of linearly organized NMY-2 relative to the a-p-axis. **(G)** Left: Maximum projected stills from  
 220 time lapse microscopy of representative wt embryos expressing either lifeact::mCherry or NMY-  
 221 2::GFP. Scale bar = 10  $\mu\text{m}$ . Right: Quantification of signal intensities from the embryos depicted in

222 the middle panel. **(H)** Left: Organization of NMY-2 and F-actin during onset of cytokinesis. Maximum  
223 projected stills from time lapse microscopy of embryos expressing *lifeact::mCherry* and *NMY-2::GFP*.  
224 White arrow heads mark persistent actin foci. Scale bar = 10  $\mu\text{m}$ . Right: Enlarged cortical areas from  
225 left panels showing localization of NMY-2 on actin filaments (1) and NMY-2 foci connected by actin  
226 filaments (2). Scale bar = 2.5  $\mu\text{m}$ . **(I)** Kymographs for *lifeact* (top) and NMY-2 (bottom) at the midbody  
227 region (generated along the dashed yellow line in panel G). Scale bar = 2.5  $\mu\text{m}$ .

### 228 3.2 Uniaxial loading counteracts longitudinal flows

229 In order to probe cytokinesis mechanics, we used the well-established parallel plate assay [35-  
230 37]. To achieve highly consistent uniaxial loading in the parallel plate assay, we employed  
231 monodisperse, inert beads with diameters of 25, 20, 15, and 13.5  $\mu\text{m}$ , (representing 0, 20, 40, and  
232 46% uniaxial compression, respectively; Video 2). Uniaxial loading induces a shape anisotropy where  
233 the surfaces contacting the plates become flat and the remaining surfaces start to bulge. Importantly,  
234 it has been shown that uniaxial loading directly impinges on cortex mechanics since (a) the cell  
235 boundary is governed by Laplace's law (Figure 2A) [37]; (b) external friction (friction between the  
236 actomyosin cortex and the plasma membrane/vitelline membrane/egg shell) can be neglected [29,  
237 49]; (c) the elastic cortical layer dominates cell mechanics in the system while the contribution of the  
238 plasma membrane can be largely ignored [38, 49, 50]. Analyzing longitudinal NMY-2 cortical flow  
239 prior to the onset of furrowing, we found that longitudinal flow velocities are highest in unloaded  
240 embryos and decrease with increased loading (Figure 2B, left). Flow velocities were down to 3.5 and  
241 3.4  $\mu\text{m}/\text{min}$  in anterior and posterior domains, respectively, in 20% compressed embryos and  
242 decrease further to 1.8 and 2.8  $\mu\text{m}/\text{min}$  with 40% compression (Figure 2B; Figure S1A). Wt embryos  
243 compressed by 46% reach only -0.7 and 1.8  $\mu\text{m}/\text{min}$  and fail to cleave (Video 2). The strong reduction  
244 of longitudinal flow (flow along the a-p axis) is best apparent in superimpositions of consecutive  
245 frames from time lapse recordings (Figure 2B, right). Interestingly, the reduction of longitudinal flow  
246 scales to the amount of loading, suggesting that the cortex behaves like an elastic material (Figure  
247 S1B).

248 Consistent with F-actin having faster cortical turnover, we find slightly weaker and less uniform  
249 longitudinal flow for F-actin (*lifeact*) compared to NMY-2 (Figure 2C, Figure S1A). Since uniaxial  
250 compression induces a shape anisotropy that leads to anisotropic stress in the cortex [38], this might  
251 alter cortical tension and impinge on longitudinal cortical flows. To test this, we performed cortical  
252 laser ablations [29] just prior to the onset of polarizing flow after fertilization parallel to the short axis  
253 of the embryo (cuts of 23% embryo width; Figure 2D, Video 3). We chose this time point for ablations  
254 since the cortex shows a highly similar architecture to the cortex just prior to cytokinesis [9] and the  
255 measurements are not confounded by fast changing patterns of flows. We made sure that the cortical  
256 wound induced by laser ablation did not vary in size under different degrees of compression (Figure  
257 S1C). Measuring outward velocities of NMY-2 foci post ablation, we found that increased loading  
258 generates increased outward flow velocities ( $11 \pm 0.6$   $\mu\text{m}/\text{min}$  at 20% compression,  $23 \pm 1$   $\mu\text{m}/\text{min}$  at  
259 40% compression, and  $43 \pm 2$   $\mu\text{m}/\text{min}$  at 46% compression; Figure 2D). Notably, our ablation  
260 experiments only allow measurements of changes in total mechanical stress but not the relative  
261 contribution of passive and active stresses. Although our ablation experiments were performed before  
262 onset of cytokinetic flows, they clearly demonstrate a response of the cortex that scales to loading  
263 nevertheless. Thus, our observations are consistent with the interpretation that uniaxial compression  
264 induces cortical stress which seems to counteract longitudinal flows (Figure 2B) and eventually  
265 prevents successful furrowing.

266



Figure 2

8 of 20

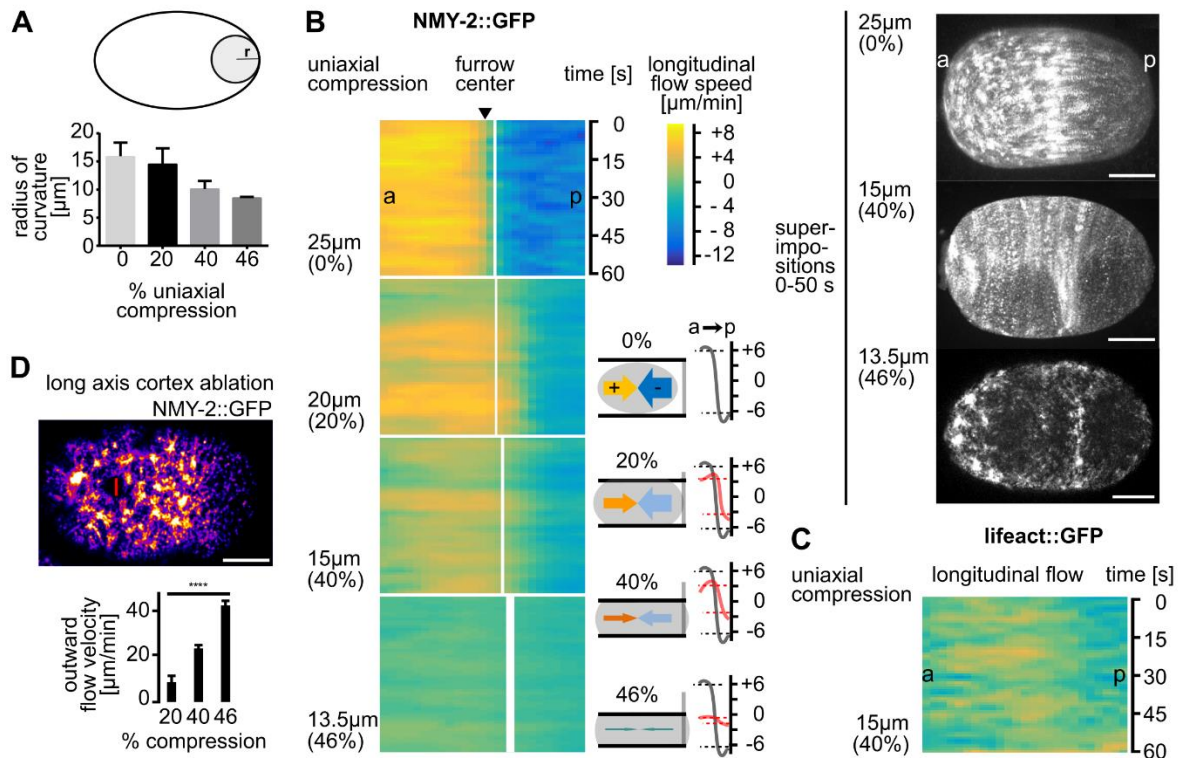

267

268 **Figure 2.** Longitudinal NMY-2 flow is mechanosensitive. **(A)** Quantification of curvature increase due  
 269 to compression. Smaller radii represent higher curvature (see cartoon and Methods). **(B)** Left: Heat  
 270 map kymographs of cortical flow velocities obtained from PIV of NMY-2::GFP foci moving along the  
 271 long axis of differently mounted one-cell *C. elegans* embryos. For statistical parameters of heat maps  
 272 see Fig. S1A. Black arrow head points to the white line demarcating the future furrow. Thickness of  
 273 the line represents standard deviation. Bottom middle: Paradigm of uniaxial compression and  
 274 corresponding flow velocities. Bottom right: Averaged velocities (over 60 s) along the anterior-  
 275 posterior (a-p) axis from the PIV analysis (right panels). Grey and red lines represent averaged  
 276 velocities in uncompressed and compressed embryos, respectively ( $n = 5$  each). Right:  
 277 Superimpositions generated by overlaying stills from projected time lapse images. Scale bars = 10  
 278  $\mu\text{m}$ . **(C)** Heat map kymographs generated by PIV of lifeact::mCherry for longitudinal flow. Embryos  
 279 were imaged under 40% compression ( $n = 5$ ). **(D)** Top: Representative still from NMY-2::GFP  
 280 expressing embryo exhibiting a cortical wound inflicted by UV laser cutting along the short axis of the  
 281 embryo. Left: Quantification of outward flow velocities following cortical wounding under increasing  
 282 compression ( $n = 5$  each). See also Video 3.

### 283 3.3 Rotational flow is induced upon uniaxial loading

284 Work from our lab and others has uncovered rotational flow of the cortex – which is orthogonal  
 285 to longitudinal flow – in the one-cell *C. elegans* embryo directly before contractile ring formation  
 286 (Figure 3A, top left) [19, 20]. This rotational flow also occurs *in utero* (Figure 3A, left) and is most likely  
 287 due to deformations of embryos similar to 20-40% uniaxial loading when measuring circularity of  
 288 embryos *in utero* and comparing this to contact angles measured *ex utero* for uncompressed embryos  
 289 (Figure 3A, right). However, the questions whether this flow is an intrinsic property or whether it needs  
 290 a trigger and how it contributes to cytokinesis itself have not been addressed so far. Utilizing the  
 291 paradigm of the uniaxial loading by the parallel plate assay, we observed that while longitudinal NMY-  
 292 2 flow velocities decrease, rotational cortical flow velocities increase concomitantly (Figure 3B, Figure  
 293 S1D, Videos 2,4), from  $0.8 \pm 0.02 \mu\text{m}/\text{min}$  in uncompressed to a maximum of  $23 \pm 0.1 \mu\text{m}/\text{min}$  in 40%  
 294 compressed embryos. Under very high loading, rotational flow is virtually absent due to accumulation  
 295 of NMY-2, F-actin and activated RhoA on bulging surfaces (see below). Remarkably, this shows that



296 rotational flow is strongly enhanced by mechanical stress. Again, consistent with F-actin showing  
297 faster cortical turnover, we also find that F-actin shows a shorter range of rotational flow (Figure 3C,  
298 Figure S1D). More importantly, the magnitude of rotational cortical flow scales to the amount of  
299 loading (Figure S1E). Together with the scaling of longitudinal flows (Figure S1B), this strongly  
300 suggests that the two phenomena are not simply occurring coincidentally but that they are most likely  
301 interdependent.

302 Based on these findings we asked how stress created by uniaxial compression [38] contributes  
303 to rotational cortical flow. Analyzing the distribution of NMY-2, F-actin and active RHO-1 (using a  
304 RhoA sensor consisting of GFP fused to the AH-and PH-domains of ANI-1; [31]) we found cytokinetic  
305 nodes assembling uniformly in uncompressed embryos. In contrast, in compressed embryos, NMY-  
306 2, F-actin, and active RhoA are only found at the equator and on bulging surfaces (Figure 3D), for  
307 which it has been shown that their cortex is more stressed [4, 7, 38]. This suggests that cell cycle-  
308 dependent RhoA activation can be local and most likely in response to cortical deformation. Shortly  
309 after their assembly, focally and linearly organized NMY-2 moves onto flattened surfaces through  
310 rotational flow (Figure 3E; Video 5). Due to actomyosin being concentrated on bulging surfaces in  
311 loaded embryos, its mobilization by rotational flow generates a flow front – the former boundary  
312 between the bulged and flat cortex - that moves over the flattened surface until the front reaches the  
313 bulged surface on the other side (Video 5).

314 Moreover, while linearly organized NMY-2 connecting cytokinetic nodes in uncompressed  
315 embryos constricts, it ruptures in compressed embryos (Figure 3E, 3F; Video 5). Rupture occurs  
316 anisotropically in the direction of rotation, starting at the front of rotational flow (Video 5). Notably, this  
317 anisotropy correlates with the asymmetric position of the midbody, midbodies always forming where  
318 rotational flow emerged, opposite to the side where cortex filament rupture occurs at the rotational  
319 flow front (Video 5). This always leads to asymmetric positioning of the midbody ( $n>20$ ; data not  
320 shown). Additionally, rupture leads to both flow towards the furrow (from the furrow-facing side of the  
321 rupture) and flow towards the poles (from the pole-facing side of the rupture) (Video 5). Flows towards  
322 the furrow have similar velocities as longitudinal flows in uncompressed embryos and can lead to  
323 similar parallel alignment of cortical material in the equatorial zone (Figure 1C, 1E). Flows towards  
324 the poles dissipate due to dissolution of nodes and lack of a barrier similar to the equatorial band of  
325 focal and linear NMY-2 (Video 5). Furthermore, these flows occur at the same time as polar blebbing  
326 is observed, which might additionally contribute to cortical relaxation of cortical tension caused by  
327 pole-directed cortical flow (Figure 3G).

328 Since uniaxial compression leads to anisotropic cortex assembly at the onset of cytokinesis and  
329 anisotropic disassembly during furrowing, we asked whether loading induces anisotropies in cortical  
330 tension that could also contribute to rotational flow. To test this, we performed laser cutting of the  
331 cortex (cuts of 16% embryo length; Figure 3H, Video 6) parallel to the long axis of the embryo just  
332 prior to the onset of polarizing flow after fertilization and observed a loading-dependent increase in  
333 initial outward flow velocities of NMY-2 particles at the site of the cortical wound ( $15\pm 0.5$   $\mu\text{m}/\text{min}$  at  
334 20% compression,  $29\pm 2$   $\mu\text{m}/\text{min}$  at 40% compression, and  $32\pm 4$   $\mu\text{m}/\text{min}$  at 46% compression; Figure  
335 3H).

336 When measuring outward velocities 5 s after cortex ablation (as established previously; [29]), it  
337 seems that tension increases along the short axis scales more linearly with loading (Figure 3H,  $R^2 =$   
338 0.94, Figure S1G) than along the long axis (Figure 2D;  $R^2 = 0.83$ , Figure S1G). Also consistent with  
339 previous work [29], tension seems to be higher along the short axis under low loading. Given the  
340 elegant theoretical framework of cortical mechanics that highlights the roles of effective viscosity and  
341 local compression rate for the generation of polarizing cortical flow [29], the above measurements  
342 suggest that besides cortical stress, viscosity and/or cortex compressibility might additionally  
343 contribute to rotational flow.

344

**Figure 3**

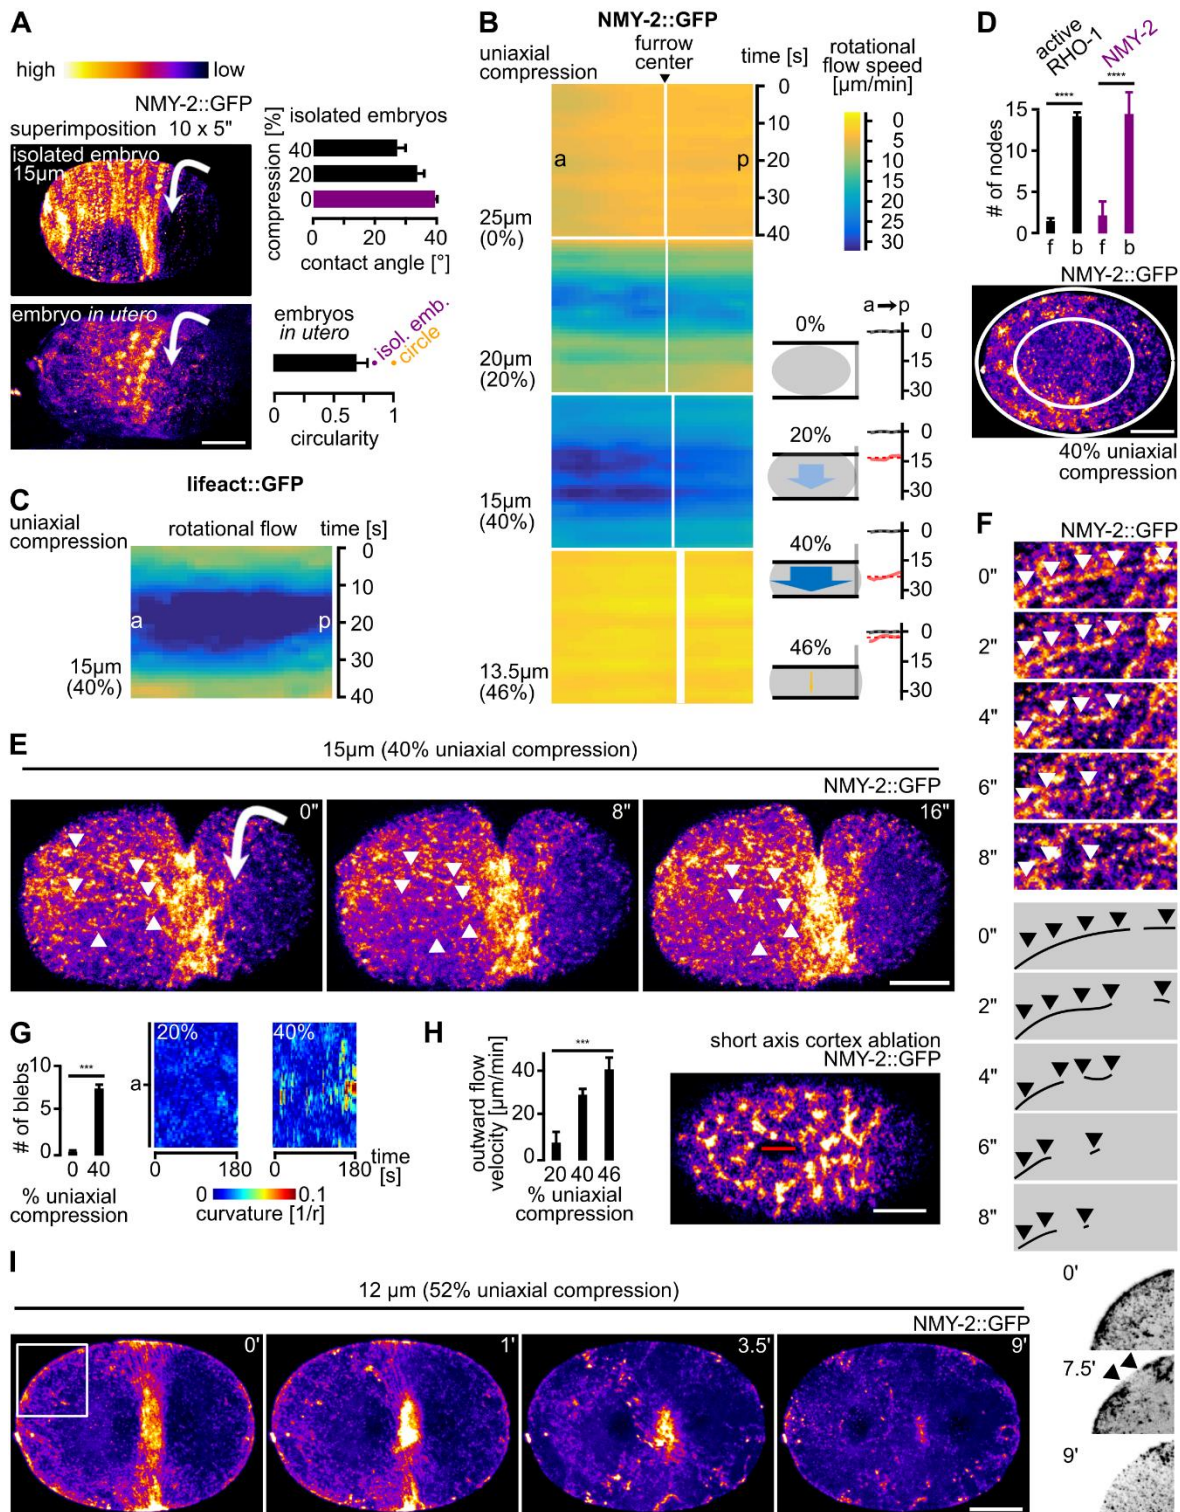

345  
346

347  
348  
349  
350  
351  
352  
353  
354

**Figure 3.** Rotational cortical flow is required for furrowing under uniaxial compression. **(A)** Left: Maximum projected stills from time lapse microscopy of a representative, isolated wt embryo (top) and an embryo inside the uterus (bottom); scale bar = 10 µm. Direction of cortical rotation is indicated by an arrow. Top right: Contact angles between coverslip and embryo. Bottom right: Circularity of embryos *in utero* (n = 6), circularity for ellipsoidal, isolated embryos and a circle are also included. **(B)** Heat map kymographs of cortical flow velocity values from NMY-2::GFP particle tracking along the short axis of differently mounted embryos. For statistical parameters of heat maps see Fig. S1D. Black arrow head points to the future furrow center. Bottom middle: Cartoon depictions of corresponding

355 rotational cortical flow velocities. Bottom right: Averaged velocities (over 60 s) along the a-p axis from  
356 the PIV analysis (left panels). Grey and red lines represent averaged velocities in uncompressed and  
357 compressed embryos, respectively (n = 5 each). **(C)** Heat map kymographs generated by PIV of  
358 *lifeact::mCherry* for rotational flow. Embryos were imaged under 40% compression (n = 5). **(D)** Top:  
359 Quantification of active RHO-1 (black) and NMY-2 (purple) nodes on flat (f) versus bulging (b) surfaces  
360 in embryos under 40% compression (n = 5 each). Right: Representative projection of an embryo  
361 illustrating the quantification for NMY-2::GFP (inner ellipse = flattened surface; see panel E for  
362 fluorescence intensity color code). Scale bar = 10  $\mu$ m. **(E)** Projections from time-lapse data (see Video  
363 5). Arrowheads point to linear cortical NMY-2 that undergoes rupture. Scale bar = 10  $\mu$ m. **(F)** Magnified  
364 projection of the cortex showing rupture of linearly organized NMY-2. Scale bar = 2.5  $\mu$ m. **(G)** Left:  
365 Quantification of the number of blebs in uncompressed and 40% compressed WT embryos over 60  
366 s. Right: Quantification of curvature changes. Two representative curvature kymographs for a 20%  
367 and a 40% compressed embryo are shown. See experimental procedures for details. **(H)** Left:  
368 Quantification of outward flow velocities following cortical wounding under increasing loads (n = 5  
369 each). Right: Representative still from a NMY-2::GFP expressing embryo exhibiting a cortical wound  
370 inflicted along the long axis of the embryo by UV laser cutting. Scale bar = 10  $\mu$ m. See also Video 6.  
371 **(I)** Cortex rupture for 52% compression. Representative projections from time-lapse microscopy are  
372 shown; scale bar = 10  $\mu$ m. The right pictures show the boxed area of the leftmost still annotated with  
373 arrowheads and inverted to illustrate cortex rupture. See also Video 8.

#### 374 *3.4 Uniaxial loading and the limit of cytokinetic mechanostability*

375 Next, we asked how rotational flow changes when we subject embryos to 46% compression, a  
376 load where embryos do not divide (Video 7). Here, we found the same anisotropic distribution of  
377 nodes as for 20% and 40% compression, however, nodes on bulged surfaces do not translocate by  
378 rotational flow. Instead, streaming of linearly organized NMY-2 in the equatorial area is observed  
379 (Video 7). Streaming does not lead to the bundling of linear NMY-2 at the equator and a contractile  
380 ring is not formed (0% of embryos; n>15). Moreover, under 46% compression, actomyosin  
381 recruitment to the equatorial zone by the central spindle pathway can still be observed, however,  
382 equatorial actomyosin recruitment is insufficient for furrowing. Similar to human cells [37], we found  
383 that the limit of cortex loading is reached at 52% (12  $\mu$ m beads; 50% for human cells). Due to  
384 increased bulging, the cortex ruptures at these bulged sites and the equatorial NMY-2 band  
385 disintegrates (Figure 3I; Video 8). This confirms that the cortex is bearing the load of compression  
386 since we neither observed rupture of the plasma membrane nor of the eggshell. Moreover, it also  
387 supports the idea that the cortex behaves like an elastic material that has a yield point at 52%  
388 compression.

#### 389 *3.5 Actin-myosin regulators required for mechanostable cytokinesis*

390 Since cortical tension along the short axis is under the control of the Rho GTPase cycle (Meyer  
391 et al., 2010) and since NMY-2 cortical polarization is observed independently of the level of loading,  
392 we performed a targeted screen to identify factors involved in cortical rotation and linear organization.  
393 For the screen, we used 20% and 40% compression of embryos, where strong rotational flow is  
394 observed in wild-type embryos (Figure 4A). This screen identified several factors including (1) MEL-  
395 11, a myosin-associated phosphatase [51], required for both focal and linearly organized NMY-2  
396 (Figure 4B; Video 9); (2) LIN-5, a factor known to regulate spindle positioning [52], which also  
397 promotes the transition from focal to linear organization and seems to stabilize the latter (Figure 4C;  
398 Video 10); (3) ECT-2, a cytokinesis regulatory RhoGEF [53], which is required for proper size and  
399 density of focal and linear NMY-2 (Figure 4D; Video 11); (4) RGA-3, a cytokinesis regulatory RhoGAP  
400 [54, 55], for which it has been previously shown that depletion leads to exaggerated rotational flow  
401 [44], and which we find is also required for node formation and to suppress excess linear organization  
402 (Figure 4E; Video 12); (5) NOP-1, a factor required in parallel with the RhoGAP CYK-4 to promote



403 RHO-1 activation and NMY-2 node formation during cytokinesis [31], which is also required for the  
 404 transition to linearly organized NMY-2 (Figure 4F; Video 13); and (6) POD-1, a type III Coronin  
 405 implicated in actin dynamics and crosslinking [56], which is as well required for this transition (Figure  
 406 4G, top panels; Video 14). Moreover, *pod-1* RNAi leads to the formation of short-lived circular  
 407 contractile NMY-2 structures, which suggests that Coronin-mediated actin crosslinking is required to  
 408 coordinate formation of long-range NMY-2 linear organization to achieve pole-to-equator flow (Figure  
 409 4G, bottom panels; Video 14).  
 410

**Figure 4**

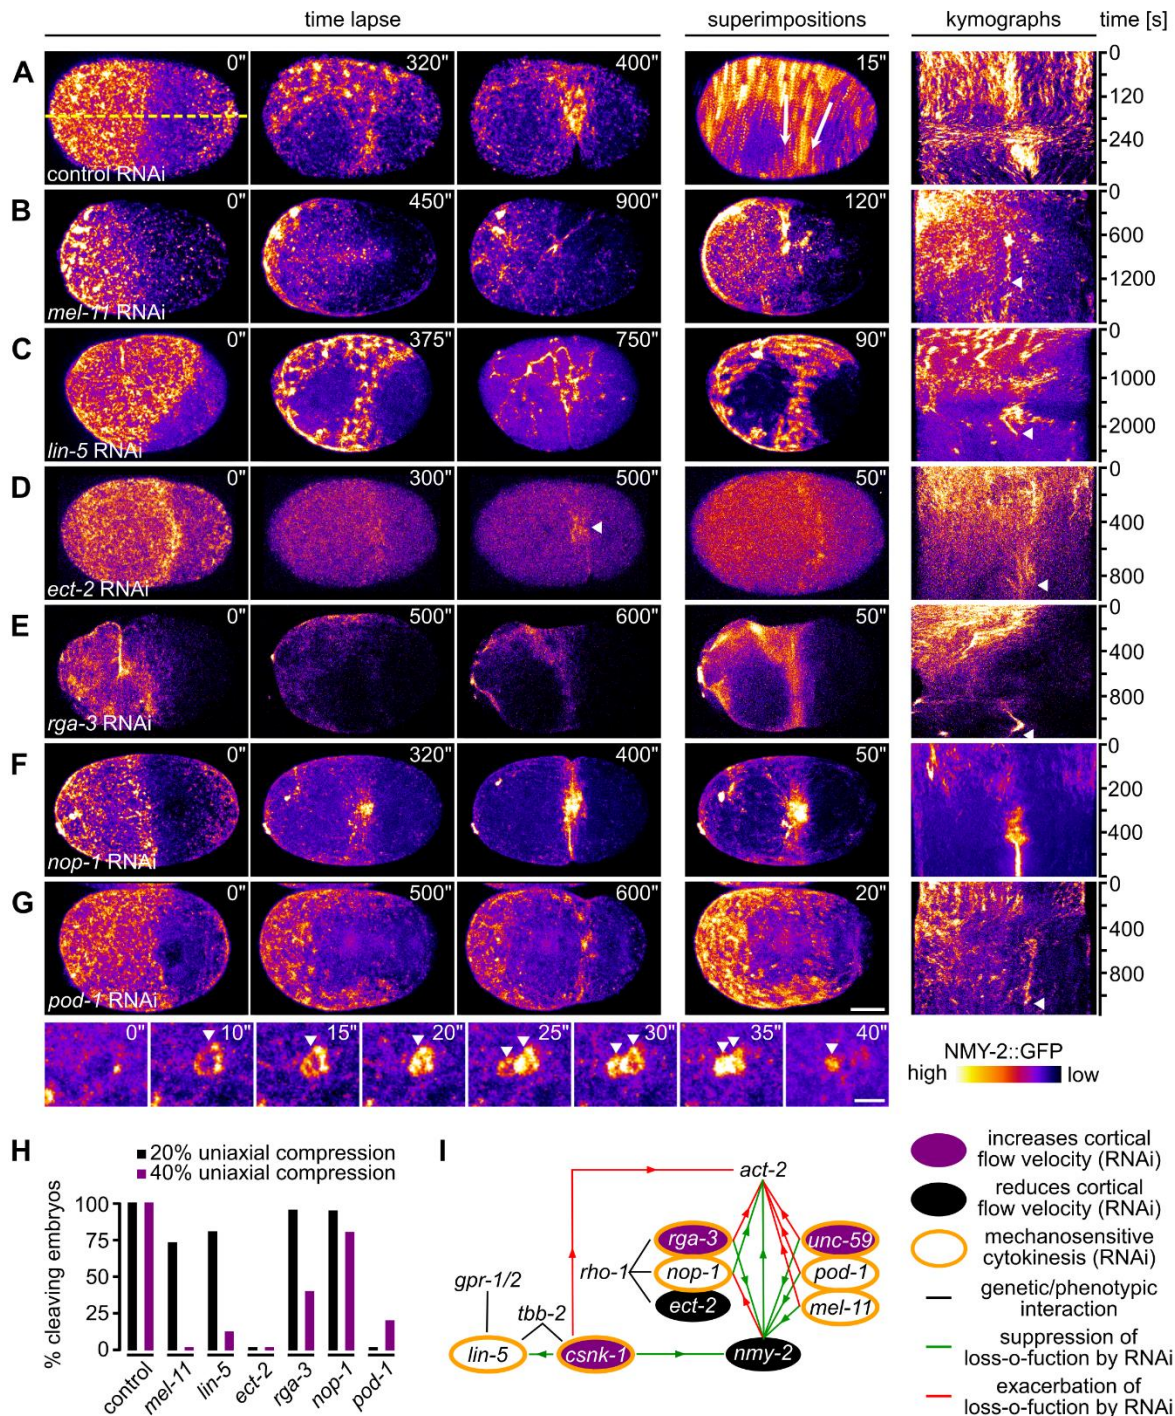

411

412 **Figure 4.** Antagonistic actin-myosin regulators are required for rotational flow and cytokinesis  
 413 mechanostability. **(A)** Left: Maximum projected stills from time lapse microscopy of a representative  
 414 wt embryo expressing NMY-2::GFP. Middle: Superimposition of frames from a 15 s time window.



415 White arrows indicate direction of rotational flow. Right: Kymograph generated along the dashed  
416 yellow line in the leftmost panel. **(B-G)** Representations as in panel (A) but for embryos treated with  
417 the indicated RNAi. Scale bar = 10  $\mu\text{m}$ . See also Videos 9-14. Bottom of panel (G): Magnification of  
418 projected stills showing formation of cortical circular structures (arrowheads) in *pod-1* RNAi embryos.  
419 Scale bar = 2.5  $\mu\text{m}$ . See also Video 14. **(H)** Quantification of successful first cell division for the  
420 indicated RNAi treatments under 20% (black) and 40% (purple) compression ( $n \geq 5$  each). **(I)** Genetic  
421 network of factors controlling cytokinesis. Interactions are based on [21, 31] and data from panel H.

422  
423 Although RNAi of these regulators gives rise to very distinct phenotypes, for all factors where  
424 furrowing phenotypes were not known (MEL-11, LIN-5, RGA-3, NOP-1, and POD-1), we observed a  
425 loading-dependent failure of cytokinesis completion (Figure 4H). With the exception of *pod-1* RNAi,  
426 increased loading leads to an exacerbation of the phenotype. Remarkably, all regulators are known  
427 to have opposing phenotypes in actin (*act-2*) and myosin (*nmy-2*) mutants [32] and are directly or  
428 indirectly linked to the Rho GTPase cycle (Figure 4I). This network of factors is essential for  
429 cytokinesis' mechanical robustness and by differentially regulating NMY-2 organization seems to  
430 indirectly also affect cortical viscosity and compressibility.)

### 431 3.6 Persistent linearly polarized NMY-2 prevents cortical rotation

432 Previously it was shown that *rga-3* RNAi leads to exaggerated chiral flows during a-p polarization  
433 of the one cell *C. elegans* embryo [21, 44]. However, the data above shows that *rga-3* RNAi embryos  
434 do not divide under uniaxial compression. We therefore more closely investigated the origin of  
435 exaggerated chiral flows in *rga-3* RNAi embryos and why this prevents cytokinesis under mechanical  
436 stress. Although we observe the reported exaggerated chiral flow during a-p polarization under  
437 uniaxial loading (Figure 5A), an important additional phenotype of *rga-3* RNAi embryos is persistent  
438 and long range linearly organized cortical NMY-2, which can be observed both during a-p polarization  
439 (Fig. 5A) and right after the onset of cytokinesis (Figure 5B). This organization is maintained during  
440 cytokinesis and leads to peeling of the filaments towards the nascent midbody, lack of a proper  
441 contractile ring (Figure 5B), and strongly reduced rotational flow under load (Figure 5C). Thus, unlike  
442 in wt embryos, linearly organized cortical NMY-2 does not undergo remodelling or ruptures in *rga-3*  
443 RNAi embryos. Considering the theory of cortical torques [21] it seems likely that a persistent linear  
444 organization of NMY-2 can induce stronger and more long ranged torques than wt. We propose that  
445 this leads to excessive chiral flow during polarization but later results in lack of cortical rotation and  
446 failed cytokinesis long-range linear connections are not remodelled (Figure 5B).

### 447 3.7 Cortical chirality and polarity are required for rotational flow polarization

448 Based on previous findings demonstrating that the actomyosin cortex generates active chiral  
449 torques with invariant handedness important for axial patterning [19-21], we reasoned that regulators  
450 of cortical chirality will contribute to rotational cortical flow polarization. To do so, we used RNAi  
451 inhibiting the expression of the casein kinase 1 $\gamma$ , CSNK-1. In line with earlier observations [20], we  
452 found that in *csnk-1* RNAi embryos, rotational cortical flows can switch their handedness across the  
453 equator and, concomitantly, a strong reduction of compressivelongitudinal flow occurs (Figure 6A,  
454 left; Figure S2A). Importantly, the switch of rotational flow handedness generates shear flow in the  
455 equatorial region, which leads to dissolution of the furrow under mechanical load (Figure 6A, right,  
456 40% compression; Video 15). This phenotype is not restricted to *csnk-1* RNAi embryos, but also  
457 occurs when components of the Wnt pathway that have been shown to be required for cortical torque  
458 generation and chiral symmetry breaking are targeted by RNAi [21, 39], for instance *mom-2* (Figure  
459 6B).

460 Since the contractile ring forms by alignment of linearly organized cortical material filaments  
461 through RhoA-dependent flow, the whole system also needs to be polarized along the direction of  
462 longitudinal compressive flow. Accordingly, we find that disruption of anterior-posterior polarity in *par-*  
463 *2* or *tat-5* RNAi embryos phenocopies the *csnk-1* and *mom-2* RNAi, a lack of longitudinally polarized  
464 compressive flow and shear flow in the equatorial region (Figure 5C, Figure S2B, S2C; Video 16).  
465 Importantly, we also observed shear flow in wt embryos when they are compressed by 46% and do  
466 not divide (Figure 6C; Video 7). This suggests that under these conditions uniform rotational cortical  
467 polarization that is observed in wt embryos up to 40% compression fails after removing factors  
468 responsible for cortical polarity and chirality or by excessive loading (Figure 6C, bottom right). Next,  
469 we asked how furrowing itself is affected by uniaxial loading and we tested whether factors known to  
470 be required for the intrinsic asymmetry of furrowing such as *unc-59* (encoding a septin; [27]) are also  
471 involved (Figure 6B). Similar to the requirement of genes involved in cortical polarity and chirality, we  
472 also found that *unc-59* RNAi embryos lack rotational cortical flow (data not shown) and fail to divide  
473 under 40% compression (Figure 6B).

474 Taken together, although factors involved in cortex polarity, chirality and asymmetry have not  
475 been found to be essential for cytokinesis in previous studies, they all become essential for  
476 cytokinesis under mechanical stress (Figure 6B, 6C). Furthermore, since compression induces  
477 rotational flow and all of the above RNAi embryos also show a loss of uniform polarized rotational  
478 flow (Videos 15, 16), we measured the degree of asymmetric furrowing under increasing mechanical  
479 load. In accordance with the above findings, we found that furrowing becomes increasingly  
480 asymmetric with increased loading (Figure 6D, top). These results, although correlative, strongly  
481 suggest that loading-induced rotational flows are involved in symmetry breaking during furrowing  
482 (Figure 6D, bottom).

483  
484

**Figure 5**

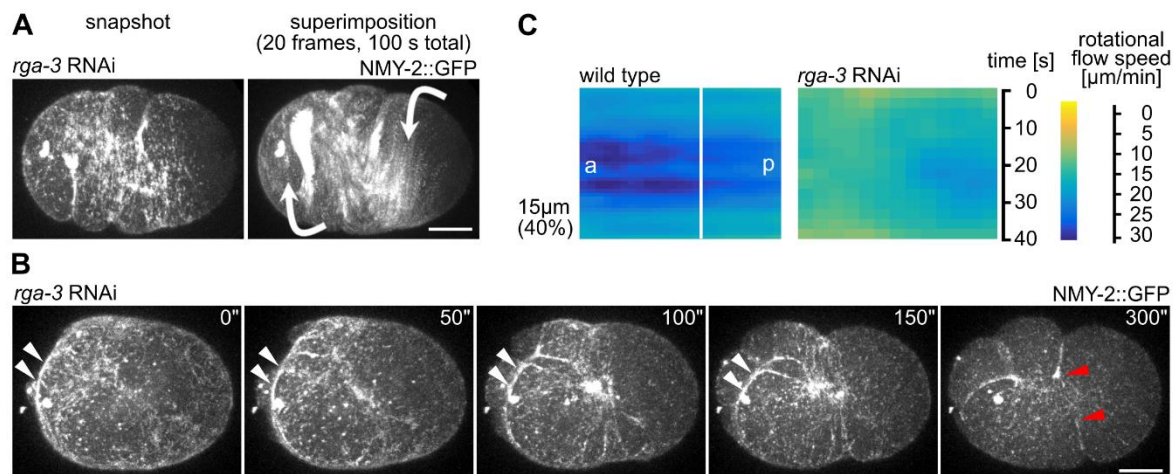

485

486 **Figure 5.** *rga-3* RNAi leads to increased linear organization of cortical NMY-2 and lack of rotational  
487 flow under load. **(A)** Still and superimposed stills from time-lapse microscopy of a representative *rga-*  
488 *3* RNAi embryo. Note the linear organization of NMY-2 and the almost exclusive rotational trajectories  
489 of cortical NMY-2 in the superimposition. Direction of rotational trajectories (arrows) have opposite  
490 polarity (anterior domain counterclockwise and posterior domain clockwise. Scale bar = 10  $\mu\text{m}$ . **(B)**  
491 Stills from a time-lapse series of a representative *rga-3* RNAi embryo during cytokinesis. White  
492 arrowheads mark long linear cortical NMY-2 that peels from the sides towards the nascent midbody.  
493 Red arrowheads mark the dissolving furrow. Scale bar = 10  $\mu\text{m}$ . **(C)** Heat map kymographs of  
494 rotational cortical flow velocity values from NMY-2::GFP particle tracking along the short axis of wt  
495 and *rga-3* RNAi embryos mounted under 40% uniaxial compression (n =5 each).

## Figure 6

15 of 20

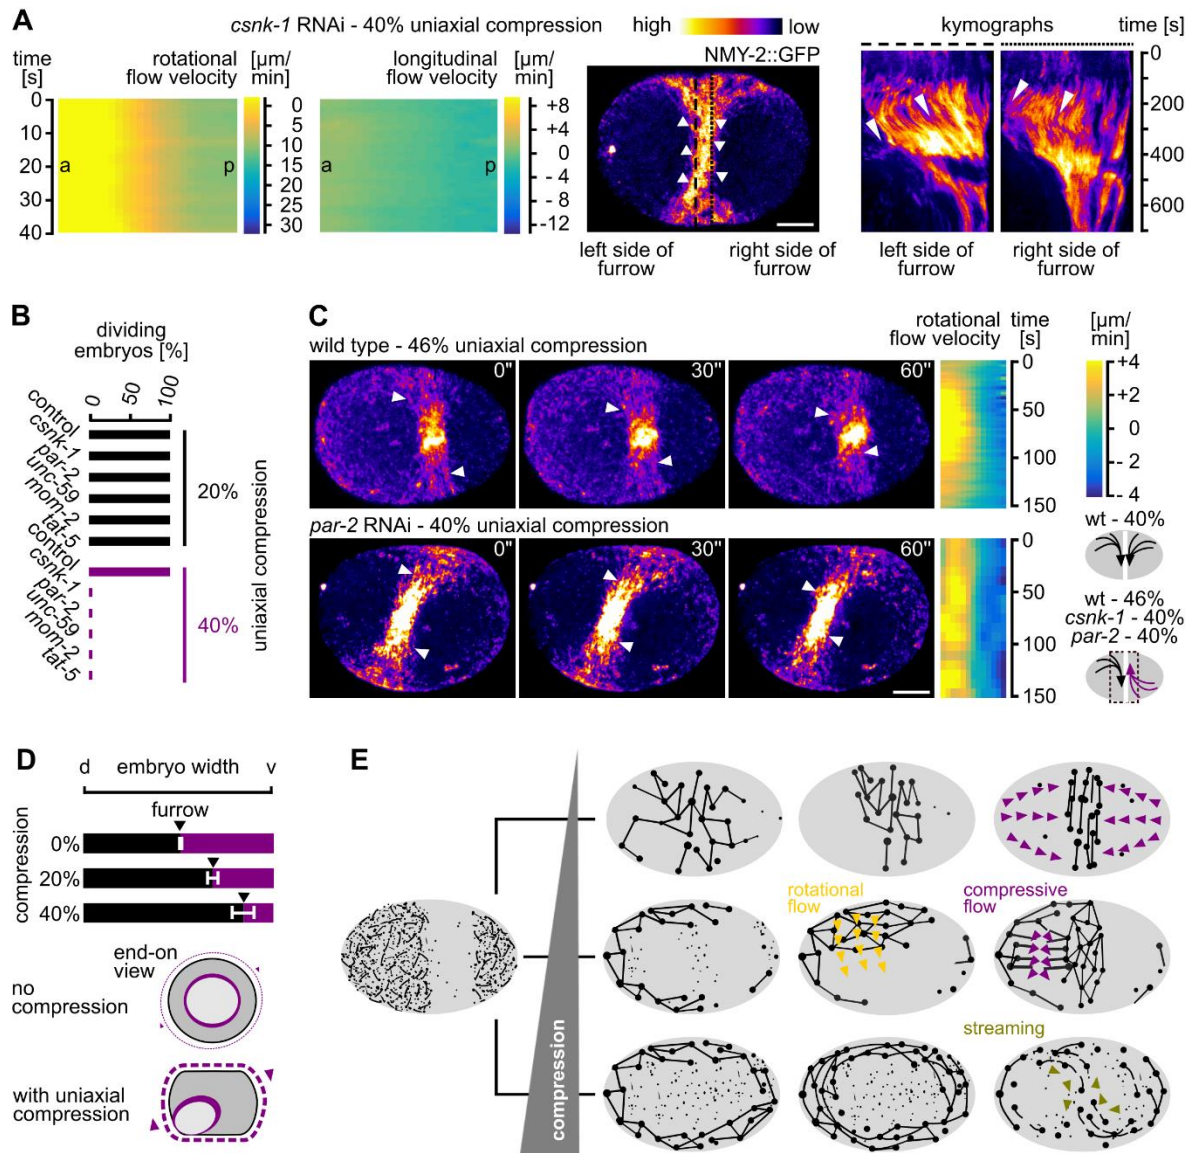

496  
497

498  
499  
500  
501  
502  
503  
504  
505  
506  
507  
508  
509  
510  
511  
512  
513  
514  
515  
516

**Figure 6.** Cortical polarity and chirality are required for mechanostable cytokinesis. **(A)** Left: Heat map kymographs generated by PIV of NMY-2 particles along the short and the long axis of one-cell *C. elegans csnk-1* RNAi embryos. All embryos were imaged under 40% compression (n = 5 each). Middle: Maximum projected still from time lapse microscopy of a representative *csnk-1* RNAi embryo expressing NMY-2::GFP; white arrowheads indicate flow direction in the furrow region; scale bar = 10 μm. See also Video 15. Right: Kymographs generated along the dashed lines at the left and right boundary of the furrow. Opposite polarity of flow is indicated by arrowheads. Note the dissolution of the furrow after 400 s. **(B)** Quantification of successful first cell division for the indicated RNAi treatments under 20% (black bars) and 40% (purple bars) compression (n = 10 each). **(C)** Left: Maximum projected stills from time lapse microscopy of a representative wt (46% compressed) and *par-2* RNAi embryo (40% compressed) expressing NMY-2::GFP; scale bar = 10 μm. See also Video 16. Middle: Heat maps generated via PIV of NMY-2 particle flow in the furrow region along the short axis. Bottom right: Cartoons depicting rotational flow polarization in wt (top) and RNAi embryos (bottom). **(D)** Furrowing asymmetry quantified in wt embryos. Top: Average furrow position along the short axis is indicated by black arrowheads (n = 5 each). Bottom: Model how lack of rotational cortical flow influences furrow asymmetry. See text for details. **(E)** Model for linearly organized cortical myosin dynamics under different conditions. Left: Cortical NMY-2 distribution before the onset of cytokinesis. Top right: Linear and focal NMY-2 coalesce into an equatorial band in unstressed embryos through longitudinal pole-to-equator flow (purple arrowheads). Middle right: With increased loading, NMY-2



517 foci show an anisotropic distribution at the onset of cytokinesis, subsequently, focal and linear NMY-  
518 2 show rotational flow (orange arrowheads) and linearly organized NMY-2 ruptures, thereby  
519 generating longitudinal flow (purple arrowheads). Bottom right: With high load, anisotropically  
520 distributed nodes transform into a linearly organized network that shows streaming, preferentially in  
521 the equatorial region.

522

#### 523 **4. Discussion**

524 Our data outline a poorly uncharacterized feature of cortical flow, its mechanosensitivity and –  
525 up to a certain stress level – its mechanostability due to its ability to re-polarize from longitudinal to  
526 rotational (Figure 6D). Moreover, we demonstrate that uniaxial compression is a straightforward  
527 experimental paradigm to systematically investigate the mechanobiology of cortical flow during  
528 asymmetric cell division. Importantly, this paradigm shows that the induction of rotational flow  
529 depends on the magnitude of total mechanical stress. We also show that re-polarization of cortical  
530 flow is followed by anisotropic cortex rupture (Figure 6D). Rupture can lead to equator-directed  
531 cortical flows during cytokinesis which result in cortical compression around the cell equator and  
532 furrowing. This seems to be one mechanism that can balance extrinsic and intrinsic forces during  
533 cytokinesis (Figure 2B, Figure 3B). These results therefore extend previous work that identified  
534 longitudinal flows as non-essential contributors to contractile ring formation [9, 17]. In addition, our  
535 results reveal that besides polarization of actin filaments through flow-alignment coupling [9], cortical  
536 non-muscle myosin II also shows flow-alignment coupling, however, by having much longer lifetimes,  
537 cortical NMY-2 shows higher flow velocities than F-actin and accumulates at the equator and in the  
538 midbody – unlike F-actin (Figure 1). The recent thorough characterization of long, linearly organized  
539 non-muscle myosin II stacks whose lifetime is independent of the neighboring F-actin filaments [48]  
540 together with our observation of different cortical flow profiles for NMY-2 and F-actin (lifeact) strongly  
541 suggests that non-muscle myosin II has roles during cell division that are separable from those F-  
542 actin, in particular during final stages of contractile ring constriction and midbody formation (Figure  
543 1G, 1I). Moreover, the proposed attractive interactions between linearly organized non-muscle  
544 myosin II [48] might also explain why we observe NMY-2 flows with longer duration and range than  
545 F-actin flows.

546 Previously, it has been demonstrated that the actomyosin cortex of embryos can be viewed as  
547 an excitable medium. In such a medium cortical flow in the form of waves is observed due to rapid  
548 local auto-activation of RhoA at wave fronts and delayed F-actin-mediated RhoA inhibition at the back  
549 of waves [57]. Treating the actomyosin cortex as an excitable material can therefore explain how the  
550 spindle determines the site of cleavage during cytokinesis, namely by generating signals that tune  
551 the auto-activation/inhibition cycle [57], it might, however, also explain the phenomena observed in  
552 this study, namely local activation of RhoA that leads to locally restricted non-muscle myosin II  
553 activation and stress-dependent flow polarization. In the framework of an excitable material, it seems  
554 most likely that local RhoA activation in uniaxially loaded *C. elegans* embryos is due to cell cycle  
555 state-dependent local auto-activation of RhoA on bulged areas of the cortex through a previously  
556 characterized mechanosensitive positive feedback [2]. The spatially restricted RhoA activation at  
557 these sites would then lead to the formation of a flow front during rotational flow (Video 5). Moreover,  
558 it also seems likely that anisotropies in spindle organization and spindle-cortex contacts pattern local  
559 auto-activation and thereby flow polarization. Thus, it is tempting to speculate that strong cortical  
560 flows are restricted to cytokinesis since the cortex only shows sufficient excitability during this specific  
561 cell cycle state and that only during cytokinesis the spindle or external mechanical forces can induce  
562 patterned activation/inactivation of RhoA that will generate polarized flows.



563 In addition, we demonstrate that several pathways which all have specific, non-redundant  
564 functions outside cytokinesis, fulfil essential roles for rotational cortical flow and furrow stability when  
565 cells are mechanically stressed (Figures 4, 5, 6). These pathways include the PAR and the Wnt  
566 pathway, which are known for their role in specifying the anteroposterior and the left/right body axes,  
567 respectively. Only for the PAR pathway a connection to cortical dynamics during cytokinesis is known  
568 (Jordan et al., 2016). Remarkably, interference with any of these pathways results in a similar  
569 mechanical stress-dependent failure of cytokinesis, a loss of uniform rotational cortical flow  
570 polarization, which leads to shear flow and dissolution of the contractile ring (Figure 6). This suggests  
571 that proper anteroposterior cortical polarization (*csnk-1*, *par-2*, *tat-5*) and yet to be identified aspects  
572 of cortical polarity that relate to left/right symmetry breaking or cortical torque generation (*rga-3*, *mom-*  
573 *2*; [20, 21, 39]) become essential for furrowing under mechanical stress. Additionally, we find that  
574 proper actomyosin regulation required for intrinsically asymmetric furrowing (*unc-59*) is also essential  
575 for cytokinesis mechanostability. This data supports earlier findings based on which it was argued  
576 that when the intrinsic asymmetry is disrupted, cytokinesis becomes sensitive to partial inhibition of  
577 contractility [27]. It should be noted that not only *csnk-1*, *rga-3*, and *unc-59* but also *par-2* and *tat-5*  
578 RNAi influence cortical cytoskeletal dynamics directly and further work involving super-resolution  
579 microscopy will be required to identify the origin of cortical cytoskeleton polarization during  
580 cytokinesis.

581 Although the data that we present here is correlative in many aspects, it nevertheless suggests  
582 that cortical rotation and cytokinesis mechanostability are intricately linked and rely on factors  
583 presumably required for symmetry breaking during cytokinesis, those that provide polarity information  
584 parallel (*csnk-1*, *par-2*, *tat-5*) and orthogonal (*rga-3*, *mom-2*) to the contractile ring and factors that  
585 potentially translate such polar bias into directional movement of actomyosin (*unc-59*). Moreover, our  
586 data also suggests that generation of cortical torque seems to depend on linear organization of  
587 cortical non-muscle myosin II (Figure 5). However, increased cortical torque alone is not sufficient for  
588 cytokinesis to proceed normally under load. Under these conditions, the remodeling of linear cortical  
589 structures seems crucial for the re-distribution of contractile cortical material towards the cleavage  
590 furrow by longitudinal flow and assembly of a contractile equatorial ring. Taken together, our findings  
591 show that Ray Rappaport's notion that the cytokinesis machinery is 'overbuilt, inefficient, never-failed,  
592 and repaired by simple measures' [1] – in other words that cytokinesis is a robust process due to  
593 redundant regulators – might only be appropriate for unstressed cells, however, apparently redundant  
594 factors can become essential under mechanical stress.

595 **Author Contributions:** Conceptualization, C.P.; methodology, D.S., O.D.; software, O.D.; validation, D.S., C.P.;  
596 formal analysis, D.S., O.D., and C.P.; investigation, D.S., C.P.; writing—original draft preparation, C.P.; writing—  
597 review and editing, C.P.; visualization, C.P.; supervision, C.P.; project administration, C.P.; funding acquisition,  
598 C.P.

599 **Funding:** This research was funded by the Deutsche Forschungsgemeinschaft (EXC 115, FOR 1756, SFB 1177)  
600 and the LOEWE Research Cluster Ubiquitin Networks.

601 **Conflicts of Interest:** The authors declare no conflict of interest.

602

603 **References**

- 604 1. Srivastava, V.; Iglesias, P.A.; Robinson, D.N. Cytokinesis: Robust cell shape regulation. *Semin Cell Dev*  
605 *Biol* **2016**, *53*, 39-44.
- 606 2. West-Foyle, H.; Robinson, D.N. Cytokinesis mechanics and mechanosensing. *Cytoskeleton* **2012**, *69*, 700-  
607 709.
- 608 3. Mandato, C.A.; Benink, H.A.; Bement, W.M. Microtubule-actomyosin interactions in cortical flow and  
609 cytokinesis. *Cell Motil Cytoskeleton* **2000**, *45*, 87-92.
- 610 4. Luo, T.; Mohan, K.; Iglesias, P.A.; Robinson, D.N. Molecular mechanisms of cellular mechanosensing. *Nat*  
611 *Mater* **2013**, *12*, 1064-1071
- 612 5. Schiffhauer, E.S.; Luo, T.; Mohan, K.; Srivastava, V.; Qian, X.; Griffis, E.R.; Iglesias, P.A.; Robinson, D.N.  
613 Mechanoaccumulative Elements of the Mammalian Actin Cytoskeleton. *Curr Biol* **2016**, *26*, 1473-1479.
- 614 6. Mangal, S.; Sacher, J.; Kim, T.; Osório, D.S.; Motegi, F.; Carvalho, A.X.; Oegema, K.; Zanin, E. TPXL-1  
615 activates Aurora A to clear contractile ring components from the polar cortex during cytokinesis. *J Cell Biol*  
616 **2018**, *217*, 837-848.
- 617 7. Luo, T.; Mohan, K.; Srivastava, V.; Ren, Y.; Iglesias, P.A.; Robinson, D.N. Understanding the cooperative  
618 interaction between myosin II and actin cross-linkers mediated by actin filaments during mechanosensation.  
619 *Biophys J* **2012**, *102*, 238-247.
- 620 8. Ennomani, H.; Letort, G.; Guérin, C.; Martiel, J.L.; Cao, W.; Nédélec, F.; De La Cruz, E.M.; Théry, M.;  
621 Blanchoin, L. Architecture and Connectivity Govern Actin Network Contractility. *Curr Biol* **2016**, *26*, 616-  
622 626.
- 623 9. Reymann, A.C.; Staniscia, F.; Erzberger, A.; Salbreux, G.; Grill, S.W. Cortical flow aligns actin filaments to  
624 form a furrow. *Elife* **2016**, *5*, e17807. (White and Borisy, 1983)
- 625 10. Bray, D.; White, J.G. Cortical flow in animal cells. *Science* **1988**, *239*, 883-888.
- 626 11. Cao, L.G.; Wang, Y.L. Mechanism of the formation of contractile ring in dividing cultured animal cells. II.  
627 Cortical movement of microinjected actin filaments. *J Cell Biol* **1990**, *111*, 1905-1911.
- 628 12. Murthy, K.; Wadsworth, P. Myosin-II-dependent localization and dynamics of F-actin during cytokinesis.  
629 *Curr Biol* **2005**, *15*, 724-731.;
- 630 13. Chen, W.; Foss, M.; Tseng, K.F.; Zhang, D. Redundant mechanisms recruit actin into the contractile ring in  
631 silkworm spermatocytes. *PLoS Biol* **2008**, *6*, e209.
- 632 14. Yumura, S.; Ueda, M.; Sako, Y.; Kitanishi-Yumura, T.; Yanagida, T. Multiple mechanisms for accumulation  
633 of myosin II filaments at the equator during cytokinesis. *Traffic* **2008**, *9*, 2089-2099.
- 634 15. Zhou, M.; Wang, Y.L. Distinct pathways for the early recruitment of myosin II and actin to the cytokinetic  
635 furrow. *Mol Biol Cell* **2008**, *19*, 318-326.
- 636 16. He, B.; Martin, A.; Wieschaus, E. Flow-dependent myosin recruitment during *Drosophila* cellularization  
637 requires zygotic *dunk* activity. *Development* **2016**, *143*, 2417-2430.
- 638 17. Khaliullin, R.N.; Green, R.A.; Shi, L.Z.; Gomez-Cavazos, J.S.; Berns, M.W.; Desai, A.; Oegema, K. A  
639 positive-feedback-based mechanism for constriction rate acceleration during cytokinesis in *Caenorhabditis*  
640 *elegans*. *Elife* **2018**, *7*, e36073.
- 641 18. Munro, E.; Nance, J.; Priess, J.R. Cortical flows powered by asymmetrical contraction transport PAR  
642 proteins to establish and maintain anterior-posterior polarity in the early *C. elegans* embryo. *Dev Cell* **2004**,  
643 *7*, 413-424.
- 644 19. Schonegg, S.; Hyman, A.A.; Wood, W.B. Timing and mechanism of the initial cue establishing handed left-  
645 right asymmetry in *Caenorhabditis elegans* embryos. *Genesis* **2014**, *52*, 572-580.
- 646 20. Singh, D.; Pohl, C. Coupling of rotational cortical flow, asymmetric midbody positioning, and spindle rotation  
647 mediates dorsoventral axis formation in *C. elegans*. *Dev Cell* **2014**, *28*, 253-267.
- 648 21. Naganathan, S.R.; Fürthauer, S.; Nishikawa, M.; Jülicher, F.; Grill, S.W. Active torque generation by the  
649 actomyosin cell cortex drives left-right symmetry breaking. *Elife* **2014**, *3*, e04165.
- 650 22. Pohl, C. Cytoskeletal symmetry breaking and chirality: From reconstituted systems to animal development.  
651 *Symmetry* **2015**, *7*, 2062-2107.
- 652 23. Nishizaka, T.; Yagi, T.; Tanaka, Y.; Ishiwata, S. Right-handed rotation of an actin filament in an in vitro  
653 motile system. *Nature* **1993**, *361*, 269-271.
- 654 24. Sase, I.; Miyata, H.; Ishiwata, S.; Kinoshita, K. Jr. Axial rotation of sliding actin filaments revealed by single-  
655 fluorophore imaging. *Proc Natl Acad Sci U S A* **1997**, *94*, 5646-5650.

- 656 25. Beausang, J.F.; Schroeder, H.W. 3<sup>rd</sup>; Nelson, P.C.; Goldman, Y.E. Twirling of actin by myosins II and V  
657 observed via polarized TIRF in a modified gliding assay. *Biophys J* **2008**, *95*, 5820-5831.
- 658 26. Vilfan, A. Twirling motion of actin filaments in gliding assays with nonprocessive Myosin motors. *Biophys J*  
659 **2009**, *97*, 1130-1137.
- 660 27. Maddox, A.S.; Lewellyn, L.; Desai, A.; Oegema, K. Anillin and the septins promote asymmetric ingression  
661 of the cytokinetic furrow. *Dev Cell* **2007**, *12*, 827-835.
- 662 28. Lewellyn, L.; Carvalho, A.; Desai, A.; Maddox, A.S.; Oegema, K. The chromosomal passenger complex  
663 and centralspindlin independently contribute to contractile ring assembly. *J Cell Biol* **2011**, *193*, 155-169.
- 664 29. Mayer, M.; Depken, M.; Bois, J.S.; Jülicher, F.; Grill, S.W. Anisotropies in cortical tension reveal the physical  
665 basis of polarizing cortical flows. *Nature* **2010**, *467*, 617-621.
- 666 30. Tse, Y.C.; Piekny, A.; Glotzer, M. Anillin promotes astral microtubule-directed cortical myosin polarization.  
667 *Mol Biol Cell* **2011**, *22*, 3165-3175.
- 668 31. Tse, Y.C.; Werner, M.; Longhini, K.M.; Labbe, J.C.; Goldstein, B.; Glotzer, M. RhoA activation during  
669 polarization and cytokinesis of the early *Caenorhabditis elegans* embryo is differentially dependent on NOP-  
670 1 and CYK-4. *Mol Biol Cell* **2012**, *23*, 4020-4031.
- 671 32. Fievet, B.T.; Rodriguez, J.; Naganathan, S.; Lee, C.; Zeiser, E.; Ishidate, T.; Shirayama, M.; Grill, S.;  
672 Ahringer, J. Systematic genetic interaction screens uncover cell polarity regulators and functional  
673 redundancy. *Nat Cell Biol* **2013**, *15*, 103-112.;
- 674 33. Singh, D.; Odedra, D.; Lehmann, C.; Pohl, C. Acute heat shock leads to cortical domain internalization and  
675 polarity loss in the *C. elegans* embryo. *Genesis* **2016**, *54*, 220-228.
- 676 34. Silva, A.M.; Osório, D.S.; Pereira, A.J.; Maiato, H.; Pinto, I.M.; Rubinstein, B.; Gassmann, R.; Telley, I.A.;  
677 Carvalho, A.X. Robust gap repair in the contractile ring ensures timely completion of cytokinesis. *J Cell Biol*  
678 **2016**, *215*, 789-799.
- 679 35. Cole, K.S. Surface forces of the *Arbacia* egg. *J Cell Comp Physiol* **1932**, *1*, 1-9.
- 680 36. Yoneda, M.; Dan, K. Tension at the surface of the dividing sea-urchin egg. *J Exp Biol* **1972**, *57*, 575-587.
- 681 37. Fischer-Friedrich, E.; Hyman, A.A.; Jülicher, F.; Müller, D.J.; Helenius, J. Quantification of surface tension  
682 and internal pressure generated by single mitotic cells. *Sci Rep* **2014**, *4*, 6213.
- 683 38. Fischer-Friedrich, E.; Toyoda, Y.; Cattin, C.J.; Müller, D.J.; Hyman, A.A.; Jülicher, F. Rheology of the Active  
684 Cell Cortex in Mitosis. *Biophys J* **2016**, *111*, 589-600.
- 685 39. Pohl, C.; Bao, Z. Chiral forces organize left-right patterning in *C. elegans* by uncoupling midline and  
686 anteroposterior axis. *Dev Cell* **2010**, *19*, 402-412.
- 687 40. Pohl, C.; Tiongson, M.; Moore, J.L.; Santella, A.; Bao, Z. Actomyosin-based self-organization of cell  
688 internalization during *C. elegans* gastrulation. *BMC Biol* **2012**, *10*, 94.
- 689 41. Brenner, S. The genetics of *Caenorhabditis elegans*. *Genetics* **1974**, *77*, 71-94.
- 690 42. Fraser, A.G.; Kamath, R.S.; Zipperlen, P.; Martinez-Campos, M.; Sohrmann, M.; Ahringer, J. Functional  
691 genomic analysis of *C. elegans* chromosome I by systematic RNA interference. *Nature* **2000**, *408*, 325-  
692 330.
- 693 43. Rual, J.F.; Ceron, J.; Koreth, J.; Hao, T.; Nicot, A.S.; Hirozane-Kishikawa, T.; Vandenhaute, J.; Orkin, S.H.;  
694 Hill, D.E.; van den Heuvel, S.; Vidal, M. Toward improving *Caenorhabditis elegans* phenome mapping with  
695 an ORFeome-based RNAi library. *Genome Res* **2004**, *14*, 2162-2168.
- 696 44. Dutta, P.; Lehmann, C.; Odedra, D.; Singh, D.; Pohl, C. Tracking and Quantifying Developmental Processes  
697 in *C. elegans* Using Open-source Tools. *J Vis Exp* **2015**, *16*, e53469.
- 698 45. Thielicke, W.; Stamhuis, E.J. PIVlab – Towards User-friendly, Affordable and Accurate Digital Particle  
699 Image Velocimetry in MATLAB. *J Open Res Software* **2014**, *2*, e30.
- 700 46. Dickinson, D.J.; Ward, J.D.; Reiner, D.J.; Goldstein, B. Engineering the *Caenorhabditis elegans* genome  
701 using Cas9-triggered homologous recombination. *Nat Methods* **2013**, *10*, 1028-1034.
- 702 47. Salbreux, G.; Prost, J.; Joanny, J.F. Hydrodynamics of cellular cortical flows and the formation of contractile  
703 rings. *Phys Rev Lett* **2009**, *103*, 058102.
- 704 48. Hu, S.; Dasbiswas, K.; Guo, Z.; Tee, Y.H.; Thiagarajan, V.; Hersen, P.; Chew, T.L.; Safran, S.A.; Zaidel-  
705 Bar, R.; Bershadsky, A.D. Long-range self-organization of cytoskeletal myosin II filament stacks. *Nat Cell*  
706 *Biol* **2017**, *19*, 133-141.
- 707 49. Turlier, H.; Audoly, B.; Prost, J.; Joanny, J.F. Furrow constriction in animal cell cytokinesis. *Biophys J* **2014**,  
708 *106*, 114-123.
- 709 50. Tinevez, J.Y.; Schulze, U.; Salbreux, G.; Roensch, J.; Joanny, J.F.; Paluch, E. Role of cortical tension in  
710 bleb growth. *Proc Natl Acad Sci U S A* **2009**, *106*, 18581-18586.

- 711 51. Piekny, A.J.; Mains, P.E. Rho-binding kinase (LET-502) and myosin phosphatase (MEL-11) regulate  
712 cytokinesis in the early *Caenorhabditis elegans* embryo. *J Cell Sci* **2002**, *115*, 2271-2282.
- 713 52. Lorson, M.A.; Horvitz, H.R.; van den Heuvel, S. LIN-5 is a novel component of the spindle apparatus  
714 required for chromosome segregation and cleavage plane specification in *Caenorhabditis elegans*. *J Cell*  
715 *Biol* **2000**, *148*, 73-86.
- 716 53. Morita, K.; Hirono, K.; Han, M. The *Caenorhabditis elegans* ect-2 RhoGEF gene regulates cytokinesis and  
717 migration of epidermal P cells. *EMBO Rep* **2005**, *6*, 1163-1168.
- 718 54. Schmutz, C.; Stevens, J.; Spang, A. Functions of the novel RhoGAP proteins RGA-3 and RGA-4 in the  
719 germ line and in the early embryo of *C. elegans*. *Development* **2007**, *134*, 3495-3505.
- 720 55. Schonegg, S.; Constantinescu, A.T.; Hoege, C.; Hyman, A.A. The Rho GTPase-activating proteins RGA-3  
721 and RGA-4 are required to set the initial size of PAR domains in *Caenorhabditis elegans* one-cell embryos.  
722 *Proc Natl Acad Sci U S A* **2007**, *104*, 14976-14981.
- 723 56. Chan, K.T.; Creed, S.J.; Bear, J.E. Unraveling the enigma: progress towards understanding the coronin  
724 family of actin regulators. *Trends Cell Biol* **2011**, *21*, 481-488.
- 725 57. Bement, W.M.; Leda, M.; Moe, A.M.; Kita, A.M.; Larson, M.E.; Golding, A.E.; Pfeuti, C.; Su, K.C.; Miller,  
726 A.L.; Goryachev, A.B.; von Dassow, G. Activator-inhibitor coupling between Rho signalling and actin  
727 assembly makes the cell cortex an excitable medium. *Nat Cell Biol* **2015**, *17*, 1471-83
